# Supplementary material
Source: Springer Nature journal article supplement (https://www.springermedizin.de/resource/supplementary/12882_2012_275_MOESM2_ESM.pdf/9453418)
Supplement: MOESM2 [file 9453418]

# Enrollment/Registration Form

ID:  - The date of kidney biopsy (day/month/year):  /  / Patient age at kidney biopsy:  Sex:  male  femaleBlood pressure at kidney biopsy (systolic/diastolic):  / Height:  cm Current body weight:  kgBirth weight:  g Is the birth weight confirmed  
by the maternal and child health handbook?  yes  no

If the birth weight is not remembered, please check the box below.

 under 2500 g (low birth weight)  2500g or over  unknownGestation age at birth:  weeks  unknownBody weight at 20 years old:  kg  unknown  under 20 years oldFamily history of CKD:  yes  no (If yes,  hemodialysis  peritoneal dialysis  transplantation)Comorbidities: diabetes mellitus  yes  no hypertension  yes  noUsage of renin-angiotensin-aldosterone system blocker:  yes  no  unknown

## Information from ultrasound

Longitudinal area: major axis  cm minor axis  cmTransverse area: axis  cm

## Information from kidney biopsy

Biopsied side:  left  right Gauge of the needle:  GTotal cortex length in biopsied specimens:  mmTotal glomerular number, including global sclerosis:  Number of globally sclerosed glomeruli: The pathological diagnosis 

## Laboratory data

 The date of sampling (day/month/year):  /  / Serum creatinine:  mg/dl Serum cystatin C:  mg/dl HbA1c:  mg/dlSerum uric acid:  mg/dl Serum LDL:  mg/dlUrinary protein as protein/creatinine ratio (spot urine):  g/gCre24-hour creatinine clearance:  ml/min/1.73mm<sup>2</sup>24-hour protein excretion in urine:  g/day
